# Supplementary material for: Determinants of sustained stabilization of beta-cell function following short-term insulin therapy in type 2 diabetes
Source: Springer Nature journal article supplement (doi:10.1038/s41467-023-40287-w), 2023-07-27
Supplement: MOESM1 [file 41467_2023_40287_MOESM1_ESM.pdf]

## **Supplementary Information**

**Supplementary Figure 1:** Daily profile of mean capillary blood glucose during induction IIT in those with and without subsequent stabilization of beta-cell function at 2-years. The number of participants in each group is indicated by n.

**Supplementary Figure 2:** Kaplan-Meier curves showing time to initial loss of stabilization of beta-cell function between the metformin and metformin + IIT arms (defined by 2 consecutive visits with ISSI-2 lower than at baseline)

**Supplementary Figure 3:** Glucose response on the OGTT in the stabilization and non-stabilization groups at (A) baseline, (B) 3-weeks, (C) 6-months, (D) 12-months, (E) 18-months, and (F) 24-months. The number of participants in each group is indicated by n.

**Suppl Figure 1:** Daily profile of mean capillary blood glucose during induction IIT in those with and without subsequent stabilization of beta-cell function at 2-years. The number of participants in each group is indicated by n.

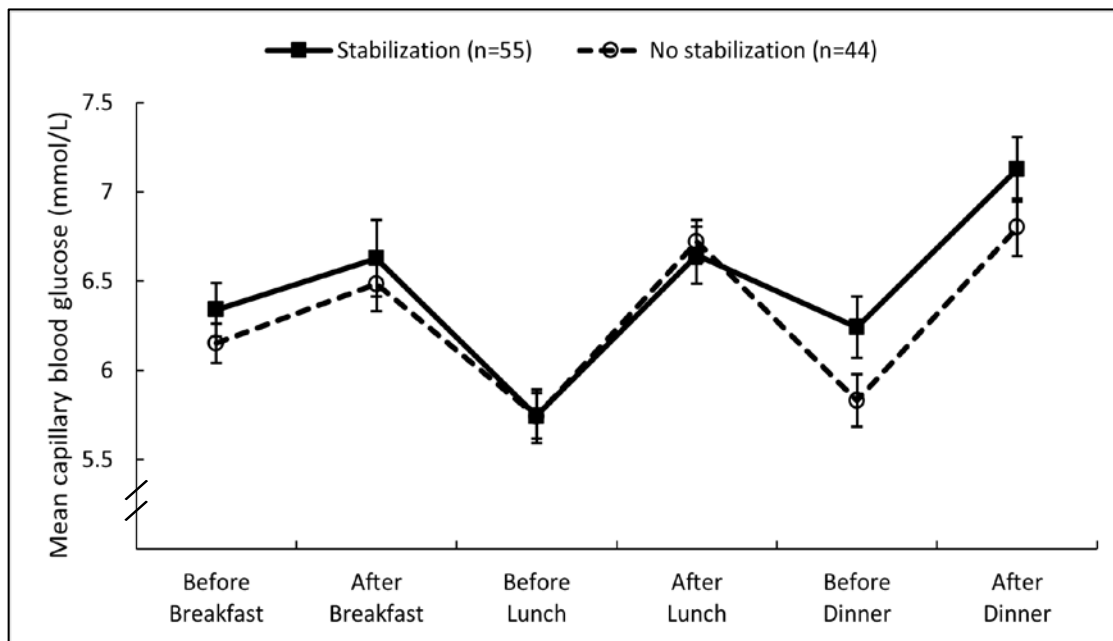

Data are presented as mean glucose  $\pm$  standard error.

Glucose measurements after meals are 2-hour post-meal

Number of participants: no stabilization n=44; stabilization n=55.

**Suppl Fig 2:** Kaplan-Meier curves showing time to initial loss of stabilization of beta-cell function between the metformin and metformin + IIT arms (defined by 2 consecutive visits with ISSI-2 lower than at baseline)

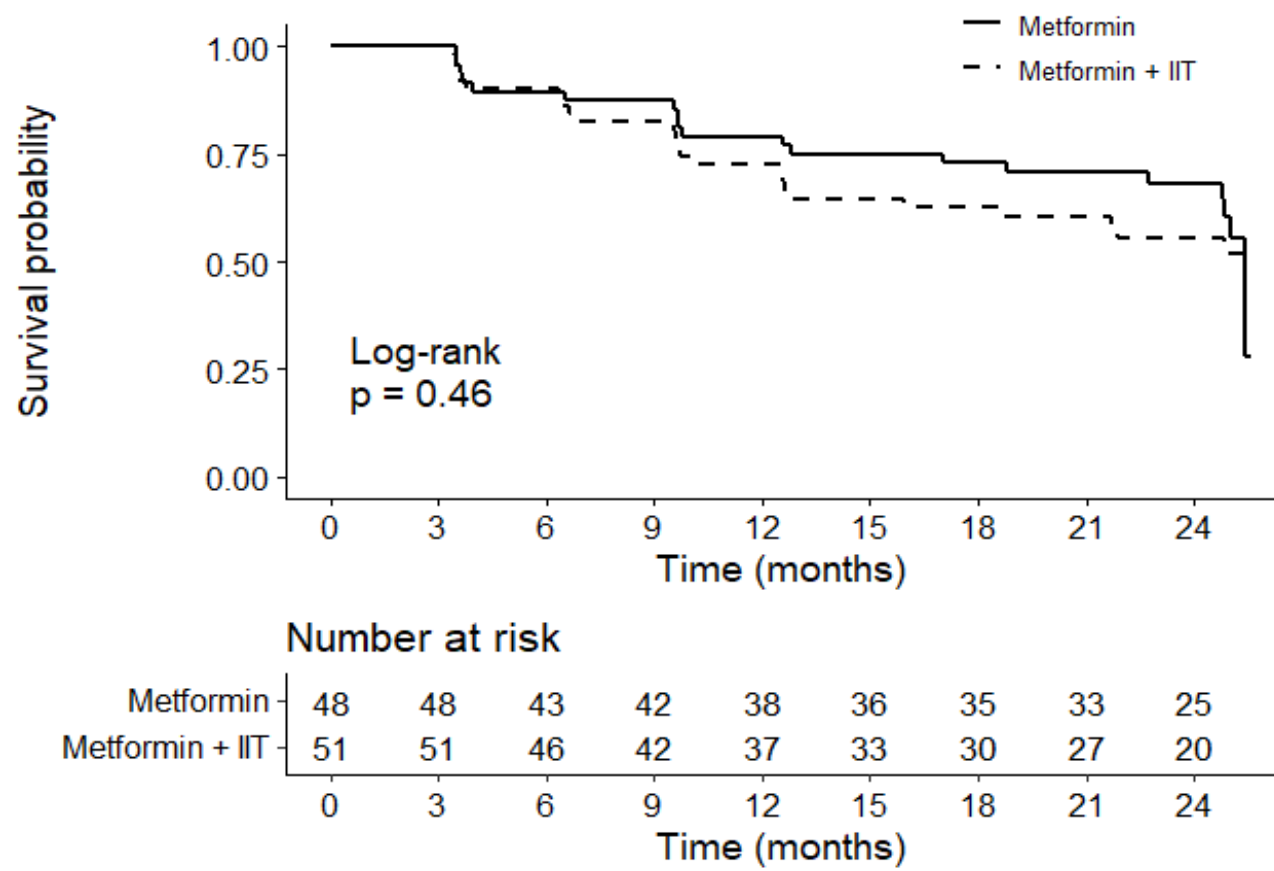

**Suppl Fig. 3:** Glucose response on the OGTT in the stabilization and non-stabilization groups at (A) baseline, (B) 3-weeks, (C) 6-months (D) 12-months, (E) 18-months, and (F) 24-months. The number of participants in each group is indicated by n.

**Panel A: At baseline**

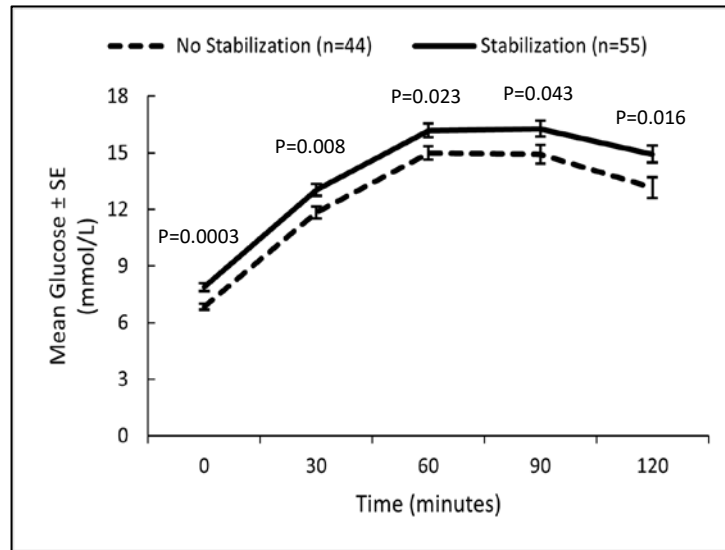

**Panel B: At 3-weeks**

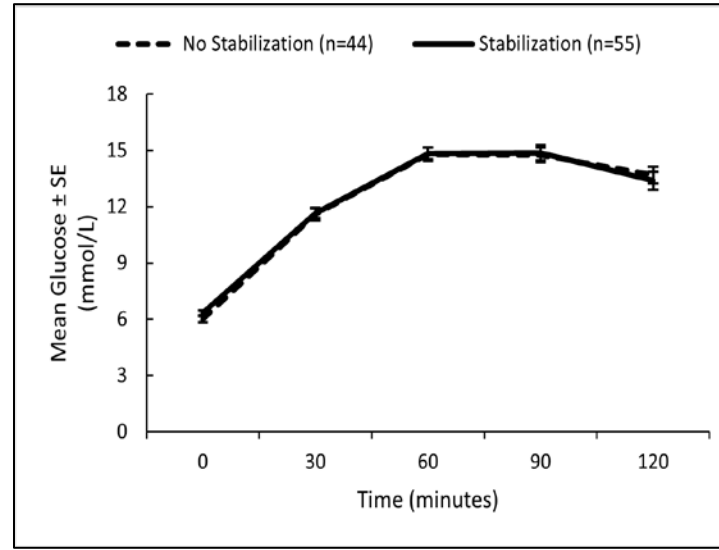

**Panel C: At 6-months**

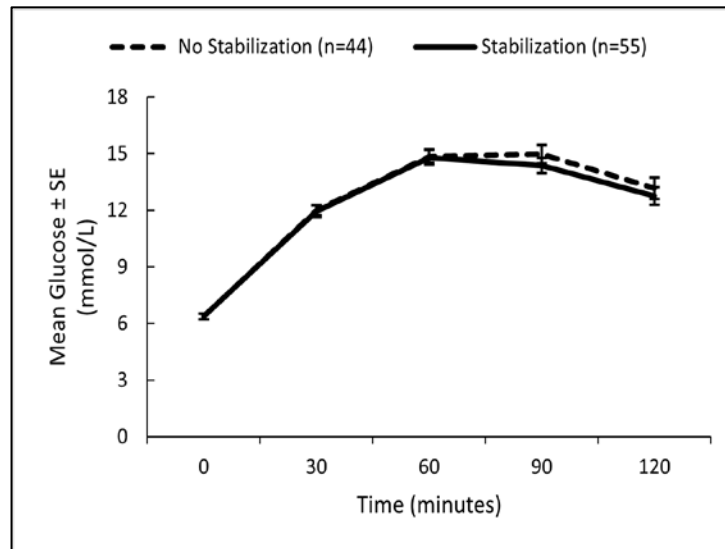

**Panel D: At 12-months**

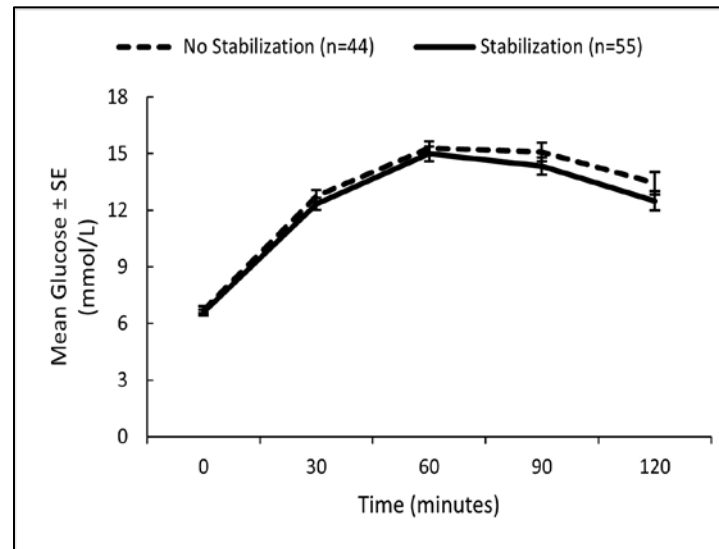

**Panel E: At 18-months**

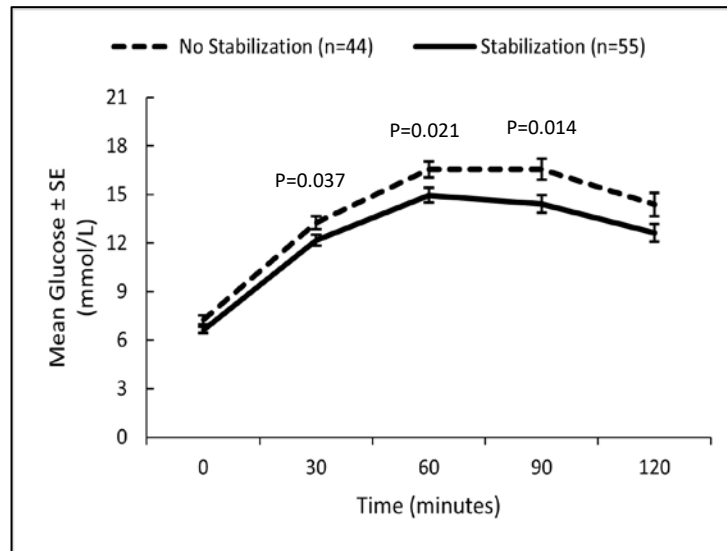

**Panel F: At 24-months**

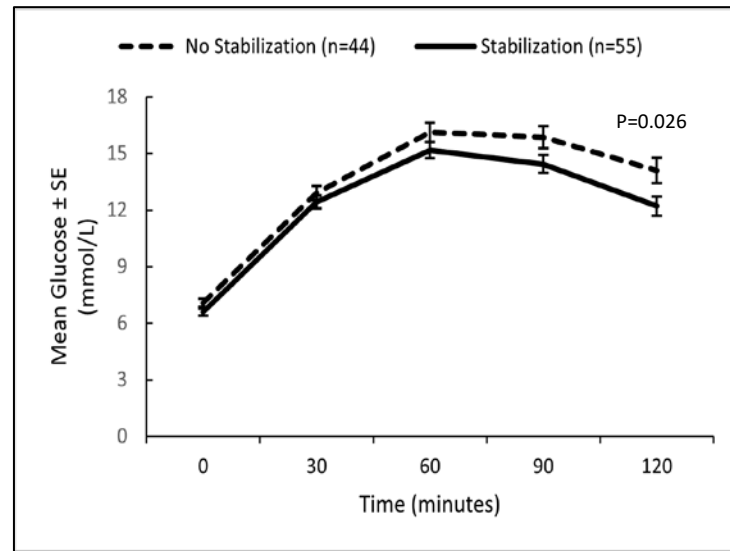

Data presented as mean  $\pm$  standard error. Two-sided t-tests were performed for the mean difference between the groups, with no adjustment for multiple comparisons. Number of participants: no stabilization n=44; stabilization n=55.
